# Supplementary material
Source: HighWire-hosted journal article supplement (doi:10.1101/rna.080288.124)
Supplement: Supplemental_Table_1.xlsx [file Supplemental_Table_1.xlsx]

## Sheet: Supplemental Table 1
Supplementary Table 1. Names of Eterna players that contributed to the OpenASO challenge.
Username	Personal Name
AndrewKae	Andrew Kaechele
Merida
mjt
Jieux
voltor	Teresa Atienza
DigitalEmbrace	Jill Townley
Astromon	William Alexander Dunlap 4th
jandersonlee	Jeff Anderson-Lee
Eli Fisker	Eli Fisker
hi1000
whbob	Bob Conroy
tone
Father_Z	Zbigniew
Max Goff	Max Goff
JR
BugacMan
ether3ric
stevetclark
c-quence
dl2007
Anamfija	Slava Butkovich
kingboo
ucad
amybarish	Amy Barish
Korosi	MONICA T GRANADOS
Poll na gColm
TheInverted
dblueskye	Daria
spvincent
WhichDoctor
IndoleScroll	Nicole Rivera
vcarter0
OSC	Osman Salih CEYHAN
kyger1
cynwulf28
