# Supplementary material
Source: HighWire-hosted journal article supplement (doi:10.1101/rna.080288.124)
Supplement: Supplemental_Table_2.xlsx [file Supplemental_Table_2.xlsx]

## Sheet: Sheet1
Supplementary Table 2. Design descriptions and sequence compositions for the Top 12 OpenASOs voted by Eterna Players.
Eterna ASO ID	Eterna ASO Name	Eterna ASO Description (positions based on Eterna seq-context)	Eterna Player	votes	UCSC ASO Name	ASO Sequence (reverese comp/antisense of F8 CDS in 5' to 3' directionality)	"T" nucleobase substitution (for IDT)	IDT-formatted ASO Sequence
11557880	Astros-branchy-piont-Pluss-P-tract-mod1	This design has the branch point in a multi-loop, the P-tract well opened, and Splice sites in a hairpin within a multiloop unpaired. The difference between this design and the original here https://eternagame.org/game/browse/11461132/?filter1=Id&filter1_arg1=11549901&filter1_arg2=11549901 is this design's ASO sequence does not bind with itself in any current engine.	Astromon	9	OpenASO1	GGGUCUUAAGGUCUUUAG	GGGTCTTAAGGTCTTTAG	/52MOErG/*/i2MOErG/*/i2MOErG/*/i2MOErT/*/i2MOErC/*/i2MOErT/*/i2MOErT/*/i2MOErA/*/i2MOErA/*/i2MOErG/*/i2MOErG/*/i2MOErT/*/i2MOErC/*/i2MOErT/*/i2MOErT/*/i2MOErT/*/i2MOErA/*/32MOErG/
11567889	JL STS Eli Mod #NuPACK #Vienna2	Mod of Eli's Silencing the Silencer #NuPACK #Vienna2. Still works in both models. Added 7 GUs to weaken the oglio association to make unbonding easier. The oglio does not tend to fold witrh itself nor bond with itself in either Vienna2 nor EternaFold.	jandersonlee	7	OpenASO2	CAAUGUUAGGGAGGUGAG	CAATGTTAGGGAGGTGAG	/52MOErC/*/i2MOErA/*/i2MOErA/*/i2MOErT/*/i2MOErG/*/i2MOErT/*/i2MOErT/*/i2MOErA/*/i2MOErG/*/i2MOErG/*/i2MOErG/*/i2MOErA/*/i2MOErG/*/i2MOErG/*/i2MOErT/*/i2MOErG/*/i2MOErA/*/32MOErG/
11604851	On loan 2	Leaves a fairly long section of PP tract unpaired (9 bases in V2 and 10 in NuPACK) and branch point is unpaired in both V2 and NuPACK. Sequence from WC OpenASO Matches sheet. Credit to Eli, jandersonlee, and Omei.	Merida	6	OpenASO3	GUUUACAUCCCUAAAAGA	GTTTACATCCCTAAAAGA	/52MOErG/*/i2MOErT/*/i2MOErT/*/i2MOErT/*/i2MOErA/*/i2MOErC/*/i2MOErA/*/i2MOErT/*/i2MOErC/*/i2MOErC/*/i2MOErC/*/i2MOErT/*/i2MOErA/*/i2MOErA/*/i2MOErA/*/i2MOErA/*/i2MOErG/*/32MOErA/
11575019	SCREAMING silencer 1	Digital embrace asked me to glob the oligo onto both silencers around INTRON 15 This begins at 92 the tail end of the (86-92) silencer and ends at 109 fully covering it and going over two bases of the other silencer (101-107)	Jieux	6	OpenASO4	CCCUAAAAGAAAUACCUG	CCCTAAAAGAAATACCTG	/52MOErC/*/i2MOErC/*/i2MOErC/*/i2MOErT/*/i2MOErA/*/i2MOErA/*/i2MOErA/*/i2MOErA/*/i2MOErG/*/i2MOErA/*/i2MOErA/*/i2MOErA/*/i2MOErT/*/i2MOErA/*/i2MOErC/*/i2MOErC/*/i2MOErT/*/32MOErG/
11552267	Staple 56-77	Finally was able to make a staple. Even works in v2.	DigitalEmbrace	6	OpenASO5	UCAAAGUAAUACCCUGGA	TCAAAGTAATACCCTGGA	/52MOErT/*/i2MOErC/*/i2MOErA/*/i2MOErA/*/i2MOErA/*/i2MOErG/*/i2MOErT/*/i2MOErA/*/i2MOErA/*/i2MOErT/*/i2MOErA/*/i2MOErC/*/i2MOErC/*/i2MOErC/*/i2MOErT/*/i2MOErG/*/i2MOErG/*/32MOErA/
11548171	AK 6.1	NuPACK masks splicing silencer 341-346 and exposes the splicing enhancer 348-354 and mutation in a bulge	AndrewKae	6	OpenASO6	GCAGUCAAGUUAGUGGGU	GCAGTCAAGTTAGTGGGT	/52MOErG/*/i2MOErC/*/i2MOErA/*/i2MOErG/*/i2MOErT/*/i2MOErC/*/i2MOErA/*/i2MOErA/*/i2MOErG/*/i2MOErT/*/i2MOErT/*/i2MOErA/*/i2MOErG/*/i2MOErT/*/i2MOErG/*/i2MOErG/*/i2MOErG/*/32MOErT/
11548080	submission 9	exposes enhancer around 190, also exposes both splice sites	hi1000	6	OpenASO7	AGGUCAACAUCAGAGAAA	AGGTCAACATCAGAGAAA	/52MOErA/*/i2MOErG/*/i2MOErG/*/i2MOErT/*/i2MOErC/*/i2MOErA/*/i2MOErA/*/i2MOErC/*/i2MOErA/*/i2MOErT/*/i2MOErC/*/i2MOErA/*/i2MOErG/*/i2MOErA/*/i2MOErG/*/i2MOErA/*/i2MOErA/*/32MOErA/
11548066	whbob_i16_401 to 418	ASO bound 5' of i16 but left splice site exposed.	whbob	6	OpenASO8	AGCACAAUAGACACCUGC	AGCACAATAGACACCTGC	/52MOErA/*/i2MOErG/*/i2MOErC/*/i2MOErA/*/i2MOErC/*/i2MOErA/*/i2MOErA/*/i2MOErT/*/i2MOErA/*/i2MOErG/*/i2MOErA/*/i2MOErC/*/i2MOErA/*/i2MOErC/*/i2MOErC/*/i2MOErT/*/i2MOErG/*/32MOErC/
11547018	#Intermolecular pseudoknot	I believe a potential pseudoknot went missing due to the mutation. I’m trying to recreate it with my oligo. I bound my oligo in a split way where it binds to two closeby silencers and hides the mutation site in the middle. View in NuPACK	Eli Fisker	6	OpenASO9	AGCCCAGGCCUUUAGUGG	AGCCCAGGCCTTTAGTGG	/52MOErA/*/i2MOErG/*/i2MOErC/*/i2MOErC/*/i2MOErC/*/i2MOErA/*/i2MOErG/*/i2MOErG/*/i2MOErC/*/i2MOErC/*/i2MOErT/*/i2MOErT/*/i2MOErT/*/i2MOErA/*/i2MOErG/*/i2MOErT/*/i2MOErG/*/32MOErG/
11544785	AK 1	partially masks 2 splicing silencers in intron 15 and opens part of the polypyrimidine tract	AndrewKae	6	OpenASO10	CCUUAGGGUUUACAUCCC	CCTTAGGGTTTACATCCC	/52MOErC/*/i2MOErC/*/i2MOErT/*/i2MOErT/*/i2MOErA/*/i2MOErG/*/i2MOErG/*/i2MOErG/*/i2MOErT/*/i2MOErT/*/i2MOErT/*/i2MOErA/*/i2MOErC/*/i2MOErA/*/i2MOErT/*/i2MOErC/*/i2MOErC/*/32MOErC/
11600061	Mar26 ASO design	Attached to Intron 15 at77-94 in Vienna2 and Nupack, silencers in both engines mostly bound, Branch point free in Nupack but not Vienna2	mjt	5	OpenASO11	CUGUCUUUUGGUCUUUAU	CTGTCTTTTGGTCTTTAT	/52MOErC/*/i2MOErT/*/i2MOErG/*/i2MOErT/*/i2MOErC/*/i2MOErT/*/i2MOErT/*/i2MOErT/*/i2MOErT/*/i2MOErG/*/i2MOErG/*/i2MOErT/*/i2MOErC/*/i2MOErT/*/i2MOErT/*/i2MOErT/*/i2MOErA/*/32MOErT/
11554562	volt-4 ASO stuck a Splicing Silencer	ASO stuck a Splicing Silencer (N:119-125) this seems to open the loop.	voltor	5	OpenASO12	AGGUCCUUAGGGUUUACA	AGGTCCTTAGGGTTTACA	/52MOErA/*/i2MOErG/*/i2MOErG/*/i2MOErT/*/i2MOErC/*/i2MOErC/*/i2MOErT/*/i2MOErT/*/i2MOErA/*/i2MOErG/*/i2MOErG/*/i2MOErG/*/i2MOErT/*/i2MOErT/*/i2MOErT/*/i2MOErA/*/i2MOErC/*/32MOErA/
