# Supplementary material
Source: HighWire-hosted journal article supplement (doi:10.1101/rna.080288.124)
Supplement: Supplemental_Table_3.xlsx [file Supplemental_Table_3.xlsx]

## Sheet: OpenASO Results
Supplemental Table 3. Statistical results from OpenASO challenge.
Number of families	1
Number of comparisons per family	13
Alpha	0.05
Dunnett's multiple comparisons test	Mean Diff.	95.00% CI of diff.	Below threshold?	Summary	Adjusted P Value	A-?
NT vs. Blocker	0.1484	0.08140 to 0.2153	Yes	****	<0.0001	B	Blocker
NT vs OpenASO 1	0.04478	-0.02218 to 0.1117	No	ns	0.3438	C	OpenASO 1
NT vs OpenASO 2	0.1189	0.05196 to 0.1859	Yes	***	0.0002	D	OpenASO 2
NT vs OpenASO 3	-0.126	-0.1930 to -0.05906	Yes	****	<0.0001	E	OpenASO 3
NT vs OpenASO 4	-0.06088	-0.1278 to 0.006072	No	ns	0.0899	F	OpenASO 4
NT vs OpenASO 5	-0.004753	-0.07171 to 0.06220	No	ns	0.9997	G	OpenASO 5
NT vs OpenASO 6	0.1439	0.07699 to 0.2109	Yes	****	<0.0001	H	OpenASO 6
NT vs OpenASO 7	0.165	0.09809 to 0.2320	Yes	****	<0.0001	I	OpenASO 7
NT vs OpenASO 8	0.1617	0.09472 to 0.2286	Yes	****	<0.0001	J	OpenASO 8
NT vs OpenASO 9	0.1556	0.08864 to 0.2226	Yes	****	<0.0001	K	OpenASO 9
NT vs OpenASO 10	-0.1883	-0.2553 to -0.1214	Yes	****	<0.0001	L	OpenASO 10
NT vs OpenASO 11	-0.08827	-0.1552 to -0.02131	Yes	**	0.005	M	OpenASO 11
NT vs OpenASO 12	-0.02215	-0.08911 to 0.04480	No	ns	0.9553	N	OpenASO 12
Test details	Mean 1	Mean 2	Mean Diff.	SE of diff.	n1	n2	q	DF
NT vs. Blocker	0.168	0.01961	0.1484	0.02241	3	3	6.62	28
NT vs OpenASO 1	0.168	0.1232	0.04478	0.02241	3	3	1.998	28
NT vs OpenASO 2	0.168	0.04905	0.1189	0.02241	3	3	5.306	28
NT vs OpenASO 3	0.168	0.294	-0.126	0.02241	3	3	5.623	28
NT vs OpenASO 4	0.168	0.2289	-0.06088	0.02241	3	3	2.717	28
NT vs OpenASO 5	0.168	0.1727	-0.004753	0.02241	3	3	0.2121	28
NT vs OpenASO 6	0.168	0.02402	0.1439	0.02241	3	3	6.423	28
NT vs OpenASO 7	0.168	0.002917	0.165	0.02241	3	3	7.365	28
NT vs OpenASO 8	0.168	0.006289	0.1617	0.02241	3	3	7.214	28
NT vs OpenASO 9	0.168	0.01237	0.1556	0.02241	3	3	6.943	28
NT vs OpenASO 10	0.168	0.3563	-0.1883	0.02241	3	3	8.403	28
NT vs OpenASO 11	0.168	0.2562	-0.08827	0.02241	3	3	3.939	28
NT vs OpenASO 12	0.168	0.1901	-0.02215	0.02241	3	3	0.9886	28
