# Supplementary material
Source: HighWire-hosted journal article supplement (doi:10.1101/rna.080288.124)
Supplement: Supplemental_Table_4.xlsx [file Supplemental_Table_4.xlsx]

## Sheet: Tse et al. 2023 ASO Walk Result
Supplemental Table 4. Statistical results from Tse et al. 2023.
Number of families	1
Number of comparisons per family	33
Alpha	0.05
Dunnett's multiple comparisons test	Mean Diff.	95.00% CI of diff.	Below threshold?	Summary	Adjusted P Value	A-?
NT vs. Blocker	0.2105	0.1735 to 0.2474	Yes	****	<0.0001	B	Blocker
NT vs. ASO 32	-0.09734	-0.1343 to -0.06042	Yes	****	<0.0001	C	ASO 32
NT vs. ASO 31	0.02045	-0.01647 to 0.05737	No	ns	0.7143	D	ASO 31
NT vs. ASO 30	-0.1859	-0.2228 to -0.1489	Yes	****	<0.0001	E	ASO 30
NT vs. ASO 29	-0.09389	-0.1308 to -0.05697	Yes	****	<0.0001	F	ASO 29
NT vs. ASO 28	0.01598	-0.02093 to 0.05290	No	ns	0.9425	G	ASO 28
NT vs. ASO 27	-0.08087	-0.1178 to -0.04396	Yes	****	<0.0001	H	ASO 27
NT vs. ASO 26	0.09605	0.05913 to 0.1330	Yes	****	<0.0001	I	ASO 26
NT vs. ASO 25	0.05407	0.01715 to 0.09098	Yes	***	0.0006	J	ASO 25
NT vs. ASO 24	0.2265	0.1896 to 0.2634	Yes	****	<0.0001	K	ASO 24
NT vs. ASO 23	0.226	0.1891 to 0.2629	Yes	****	<0.0001	L	ASO 23
NT vs. ASO 22	0.2245	0.1876 to 0.2614	Yes	****	<0.0001	M	ASO 22
NT vs. ASO 21	0.1238	0.08691 to 0.1607	Yes	****	<0.0001	N	ASO 21
NT vs. ASO 20	0.2243	0.1873 to 0.2612	Yes	****	<0.0001	O	ASO 20
NT vs. ASO 19	0.2272	0.1903 to 0.2641	Yes	****	<0.0001	P	ASO 19
NT vs. ASO 18	0.2266	0.1896 to 0.2635	Yes	****	<0.0001	Q	ASO 18
NT vs. ASO 17	0.2054	0.1684 to 0.2423	Yes	****	<0.0001	R	ASO 17
NT vs. ASO 16	0.2248	0.1879 to 0.2618	Yes	****	<0.0001	S	ASO 16
NT vs. ASO 15	0.2285	0.1915 to 0.2654	Yes	****	<0.0001	T	ASO 15
NT vs. ASO 14	0.2165	0.1796 to 0.2534	Yes	****	<0.0001	U	ASO 14
NT vs. ASO 13	0.205	0.1681 to 0.2419	Yes	****	<0.0001	V	ASO 13
NT vs. ASO 12	0.2298	0.1929 to 0.2667	Yes	****	<0.0001	W	ASO 12
NT vs. ASO 11	0.2273	0.1904 to 0.2642	Yes	****	<0.0001	X	ASO 11
NT vs. ASO 10	-0.02321	-0.06012 to 0.01371	No	ns	0.5334	Y	ASO 10
NT vs. ASO 9	-0.01609	-0.05301 to 0.02083	No	ns	0.9391	Z	ASO 9
NT vs. ASO 8	8.129e-005	-0.03683 to 0.03700	No	ns	>0.9999	AA	ASO 8
NT vs. ASO 7	0.05945	0.02253 to 0.09636	Yes	***	0.0001	AB	ASO 7
NT vs. ASO 6	-0.1254	-0.1623 to -0.08849	Yes	****	<0.0001	AC	ASO 6
NT vs. ASO 5	-0.0003113	-0.03723 to 0.03660	No	ns	>0.9999	AD	ASO 5
NT vs. ASO 4	-0.04613	-0.08305 to -0.009216	Yes	**	0.0053	AE	ASO 4
NT vs. ASO 3	-0.05301	-0.08993 to -0.01610	Yes	***	0.0008	AF	ASO 3
NT vs. ASO 2	0.005936	-0.03098 to 0.04285	No	ns	0.9993	AG	ASO 2
NT vs. ASO 1	0.04116	0.004247 to 0.07808	Yes	*	0.0188	AH	ASO 1
Test details	Mean 1	Mean 2	Mean Diff.	SE of diff.	n1	n2	q	DF
NT vs. Blocker	0.2298	0.01937	0.2105	0.0118	3	3	17.84	68
NT vs. ASO 32	0.2298	0.3272	-0.09734	0.0118	3	3	8.251	68
NT vs. ASO 31	0.2298	0.2094	0.02045	0.0118	3	3	1.733	68
NT vs. ASO 30	0.2298	0.4157	-0.1859	0.0118	3	3	15.75	68
NT vs. ASO 29	0.2298	0.3237	-0.09389	0.0118	3	3	7.958	68
NT vs. ASO 28	0.2298	0.2138	0.01598	0.0118	3	3	1.355	68
NT vs. ASO 27	0.2298	0.3107	-0.08087	0.0118	3	3	6.855	68
NT vs. ASO 26	0.2298	0.1338	0.09605	0.0118	3	3	8.141	68
NT vs. ASO 25	0.2298	0.1758	0.05407	0.0118	3	3	4.583	68
NT vs. ASO 24	0.2298	0.003298	0.2265	0.0118	3	3	19.2	68
NT vs. ASO 23	0.2298	0.003848	0.226	0.0118	3	3	19.15	68
NT vs. ASO 22	0.2298	0.005301	0.2245	0.0118	3	3	19.03	68
NT vs. ASO 21	0.2298	0.106	0.1238	0.0118	3	3	10.5	68
NT vs. ASO 20	0.2298	0.005566	0.2243	0.0118	3	3	19.01	68
NT vs. ASO 19	0.2298	0.002596	0.2272	0.0118	3	3	19.26	68
NT vs. ASO 18	0.2298	0.00326	0.2266	0.0118	3	3	19.2	68
NT vs. ASO 17	0.2298	0.02447	0.2054	0.0118	3	3	17.41	68
NT vs. ASO 16	0.2298	0.004986	0.2248	0.0118	3	3	19.06	68
NT vs. ASO 15	0.2298	0.00136	0.2285	0.0118	3	3	19.37	68
NT vs. ASO 14	0.2298	0.01334	0.2165	0.0118	3	3	18.35	68
NT vs. ASO 13	0.2298	0.02485	0.205	0.0118	3	3	17.37	68
NT vs. ASO 12	0.2298	0	0.2298	0.0118	3	3	19.48	68
NT vs. ASO 11	0.2298	0.0025	0.2273	0.0118	3	3	19.27	68
NT vs. ASO 10	0.2298	0.253	-0.02321	0.0118	3	3	1.967	68
NT vs. ASO 9	0.2298	0.2459	-0.01609	0.0118	3	3	1.364	68
NT vs. ASO 8	0.2298	0.2297	8.129e-005	0.0118	3	3	0.00689	68
NT vs. ASO 7	0.2298	0.1704	0.05945	0.0118	3	3	5.039	68
NT vs. ASO 6	0.2298	0.3552	-0.1254	0.0118	3	3	10.63	68
NT vs. ASO 5	0.2298	0.2301	-0.0003113	0.0118	3	3	0.02639	68
NT vs. ASO 4	0.2298	0.276	-0.04613	0.0118	3	3	3.91	68
NT vs. ASO 3	0.2298	0.2828	-0.05301	0.0118	3	3	4.494	68
NT vs. ASO 2	0.2298	0.2239	0.005936	0.0118	3	3	0.5031	68
NT vs. ASO 1	0.2298	0.1887	0.04116	0.0118	3	3	3.489	68
